# Supplementary material for: Electrical Vehicle Charging Load Mobility Analysis Based on a Spatial–Temporal Method in Urban Electrified-Transportation Networks
Source: MDPI journal article supplement (doi:10.3390/en16135178), 2023-07-05
Supplement: s1 [file s1]

**Table S1.** Parameters of urban electrified transportation networks.

| Node | Bus | Node | Bus | Node | Bus |
|------|-----|------|-----|------|-----|
| 1    | 1   | 12   | 12  | 23   | 4   |
| 2    | 2   | 13   | 13  | 24   | 9   |
| 3    | 3   | 14   | 14  | 25   | 11  |
| 4    | 6   | 15   | 15  | 26   | 25  |
| 5    | 24  | 16   | 16  | 27   | 26  |
| 6    | 19  | 17   | 29  | 28   | 10  |
| 7    | 20  | 18   | 28  | 29   | 8   |
| 8    | 21  | 19   | 5   | 30   | 7   |
| 9    | 22  | 20   | 23  | 31   | -   |
| 10   | 30  | 21   | 18  | 32   | -   |
| 11   | 17  | 22   | 27  | 33   | -   |

**Table S2.** Capacity of the road in the different periods.

| Time        | $\tau_t$ | Time        | $\tau_t$ |
|-------------|----------|-------------|----------|
| 00:00—07:00 | 0.2      | 14:00—17:00 | 0.3      |
| 07:00—09:00 | 0.5      | 17:00—19:00 | 0.5      |
| 09:00—12:00 | 0.3      | 19:00—23:00 | 0.3      |
| 12:00—14:00 | 0.4      | 23:00—24:00 | 0.2      |

**Table S3.** Length of the roads.

| Roads  | Length/km | Roads   | Length/km | Roads   | Length/<br>km |
|--------|-----------|---------|-----------|---------|---------------|
| (1,2)  | 10.2      | (9,11)  | 10.1      | (18,27) | 9.7           |
| (1,4)  | 10.4      | (10,11) | 9.0       | (19,20) | 10.0          |
| (2,3)  | 10.3      | (10,21) | 10.1      | (19,24) | 10.4          |
| (2,5)  | 10.5      | (11,22) | 10.2      | (19,28) | 8.8           |
| (2,6)  | 10.6      | (12,13) | 10.3      | (20,21) | 9.1           |
| (3,4)  | 10.4      | (12,16) | 10.6      | (20,25) | 10.5          |
| (3,7)  | 10.7      | (12,17) | 10.7      | (20,29) | 8.9           |
| (4,8)  | 10.8      | (13,14) | 10.4      | (21,22) | 10.2          |
| (4,9)  | 9.9       | (13,15) | 10.5      | (21,25) | 10.5          |
| (5,6)  | 10.6      | (14,15) | 9.5       | (22,30) | 11.0          |
| (5,23) | 10.3      | (14,28) | 9.7       | (23,24) | 10.4          |
| (6,7)  | 9.7       | (15,16) | 8.6       | (24,25) | 9.5           |
| (6,24) | 9.4       | (15,28) | 8.8       | (25,26) | 9.6           |
| (7,8)  | 10.8      | (16,17) | 10.7      | (27,28) | 9.8           |
| (7,25) | 9.5       | (16,29) | 8.9       | (28,29) | 8.9           |
| (8,10) | 10.0      | (17,30) | 11.0      | (29,30) | 11.0          |
| (8,26) | 9.6       | (18,19) | 8.9       | -       | -             |
| (9,10) | 9.9       | (18,23) | 10.3      | -       | -             |
